# Supplementary material for: Nitrogen-doped carbon dots for ultrasensitive detection of Hg2+ in traditional Chinese medicine and bioimaging applications
Source: Royal Society of Chemistry journal article supplement (doi:10.1039/d5ay00704f), 2025-01-01
Supplement: d5ay00704f1.pdf [file d5ay00704f1.pdf]

## Supplementary materials

# Nitrogen-Doped Carbon Dots for Ultrasensitive Detection of Hg<sup>2+</sup> in Traditional Chinese Medicine and Bioimaging Applications

Yuli Mei<sup>a,1</sup>, Shuo Yang<sup>a,1</sup>, Minghui Su<sup>a</sup>, Jianjun Xie<sup>b</sup>, Shengfeng Huang<sup>a\*</sup>, Zhengjin Jiang<sup>c\*</sup>, Yang Huang<sup>a\*</sup>

<sup>a</sup>Guangzhou Municipal and Guangdong Provincial Key Laboratory of Molecular Target & Clinical Pharmacology, the NMPA and State Key Laboratory of Respiratory Disease, School of Pharmaceutical Sciences, Guangzhou Medical University, Guangzhou 511436, China.

<sup>b</sup>Guangzhou Customs Technology Centre, Guangzhou 510623, China.

<sup>c</sup>Institute of Pharmaceutical Analysis, College of Pharmacy/State Key Laboratory of Bioactive Molecules and Drug ability Assessment/International Cooperative Laboratory of Traditional Chinese Medicine Modernization and Innovative Drug Development of Ministry of Education (MOE) of China, Jinan University, Guangzhou 510632, China

\* Corresponding author

E-mail addresses: [hsf@gzhmu.edu.cn](mailto:hsf@gzhmu.edu.cn) (Shengfeng Huang); [jzjjackson@hotmail.com](mailto:jzjjackson@hotmail.com) (Zhengjin Jiang); [huangyang@gzhmu.edu.cn](mailto:huangyang@gzhmu.edu.cn) (Yang Huang).

<sup>1</sup> These authors contributed equally to this work.

**Figures caption:**

**Figure S1.** EDS analysis for N,S-CDs-1.

**Figure S2.** EDS analysis for N,S-CDs-2.

**Figure S3.** Full scan XPS spectrum for N,S-CDs-1, (A) and N,S-CDs-2 (B).

**Figure S4.** High resolution C1s (A), O1s (B), pyrr-N1s (C) and S2p (D) of the as-prepared N,S-CDs-1.

**Figure S5.** High resolution C1s (A), O1s (B), pyri-N1s (C) and S2p (D) of the as-prepared N,S-CDs-2.

**Figure S6.** Normalized FL decay of N,S-CDs-2 and N,S-CDs-2-Hg<sup>2+</sup> under excitation at 350 nm (A). UV-Vis absorption spectra of N,S-CDs-2 and N,S-CDs-2-Hg<sup>2+</sup> (B).

**Figure S7.** Normalized FL decay of N,S-CDs-1 and N,S-CDs-1-Hg<sup>2+</sup> under excitation at 350 nm (A). UV-vis absorption spectra of N,S-CDs-1 and N,S-CDs-1-Hg<sup>2+</sup> (B).

**Figure S8.** Photography of three CDs solution (A for N-CDs, B for N,S-CDs-1 and C for N,S-CDs-2) after addition of different ions.

**Figure S9.** The selectivity N,S-CDs-1 and N,S-CDs-2 to other ions.

**Figure S10.** Cell viability of A549 cell after incubation with various concentration of N-CDs for 24 h.

**Table S1.** Parameters of the Stern-Volmer equation in the system at different temperatures.

**Table S2.** Content of Hg<sup>2+</sup> in three Sanqi sample analyzed by this method and compared to ICP-MS method.

**Fig. S1**

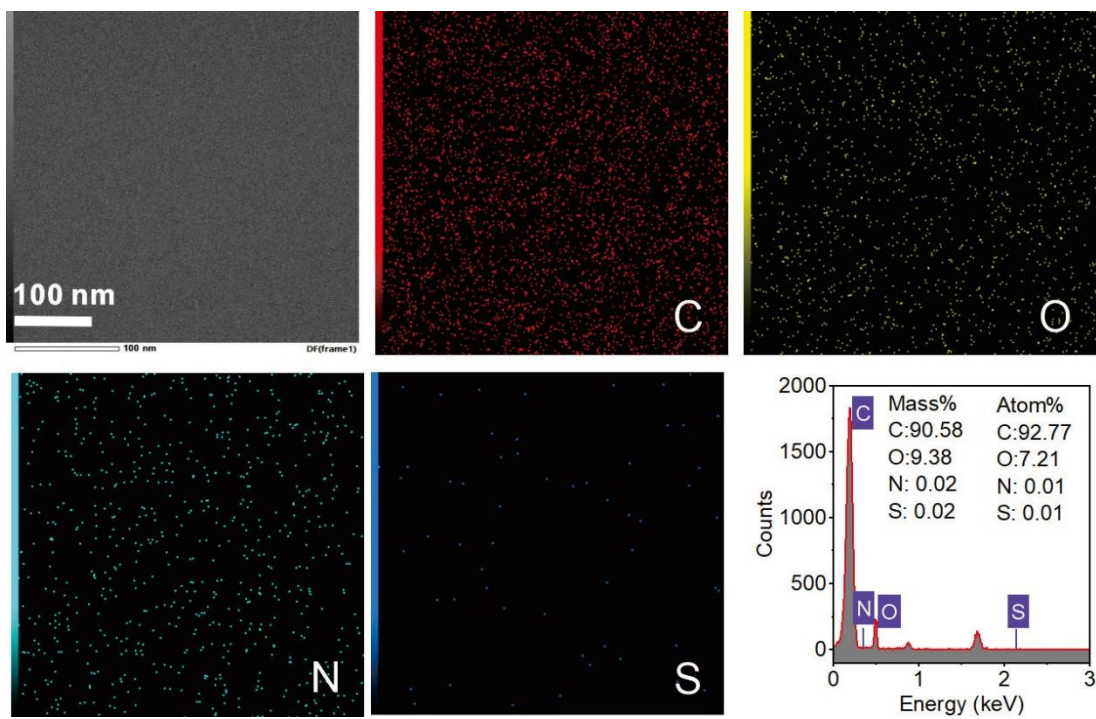

**Fig. S2**

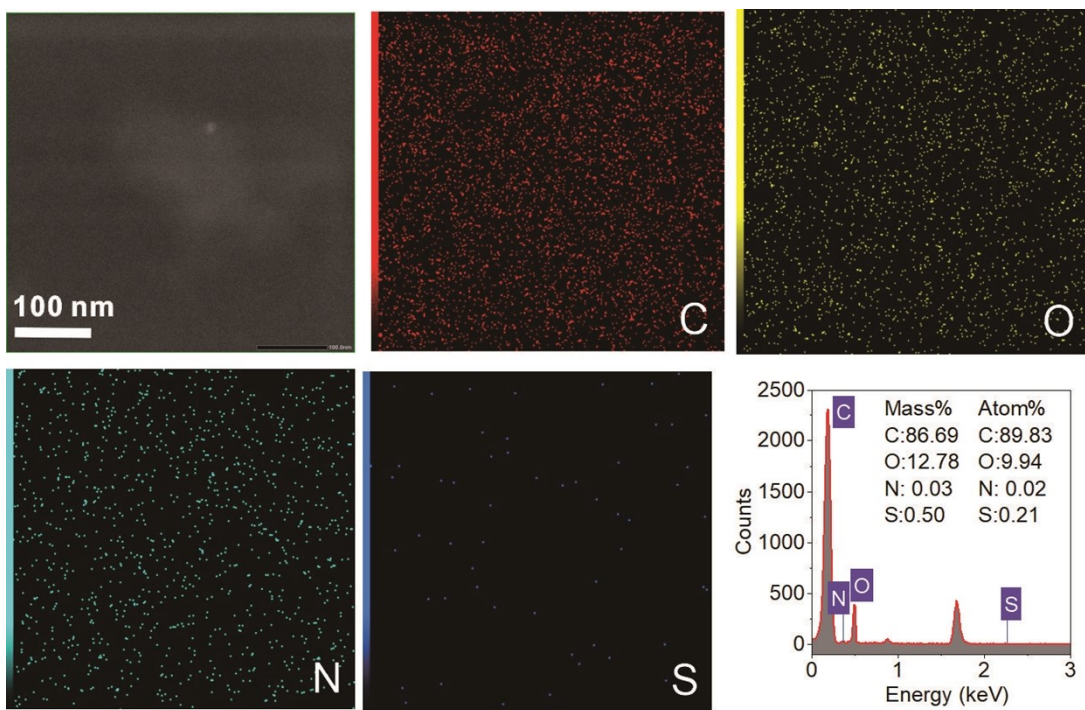

**Fig. S3.**

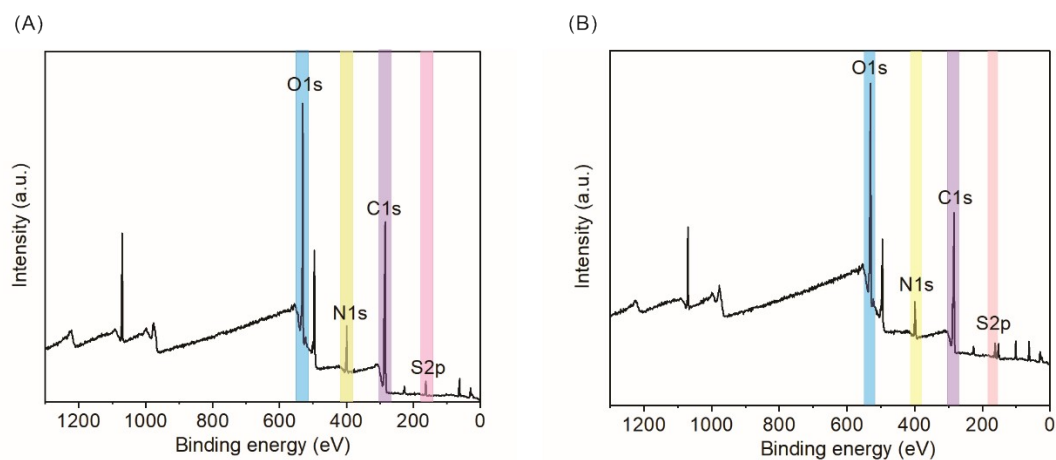

**Fig. S4.**

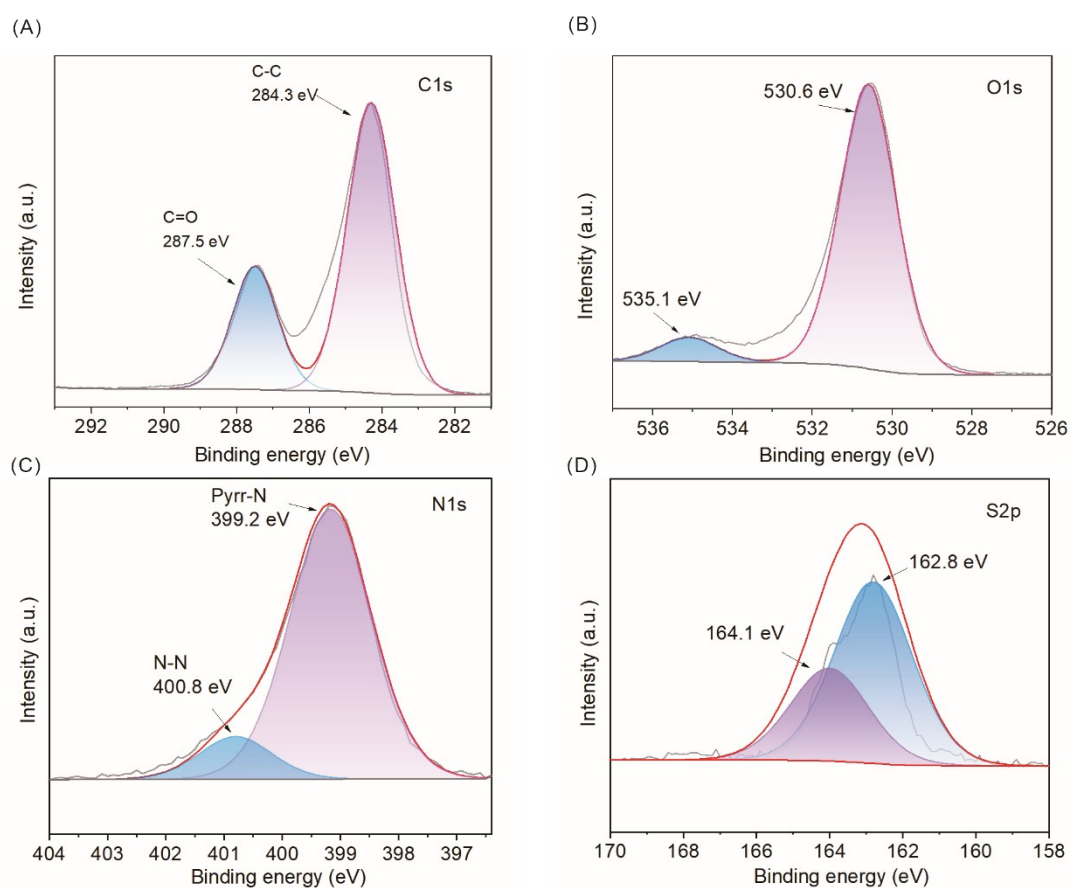

**Fig. S5.**

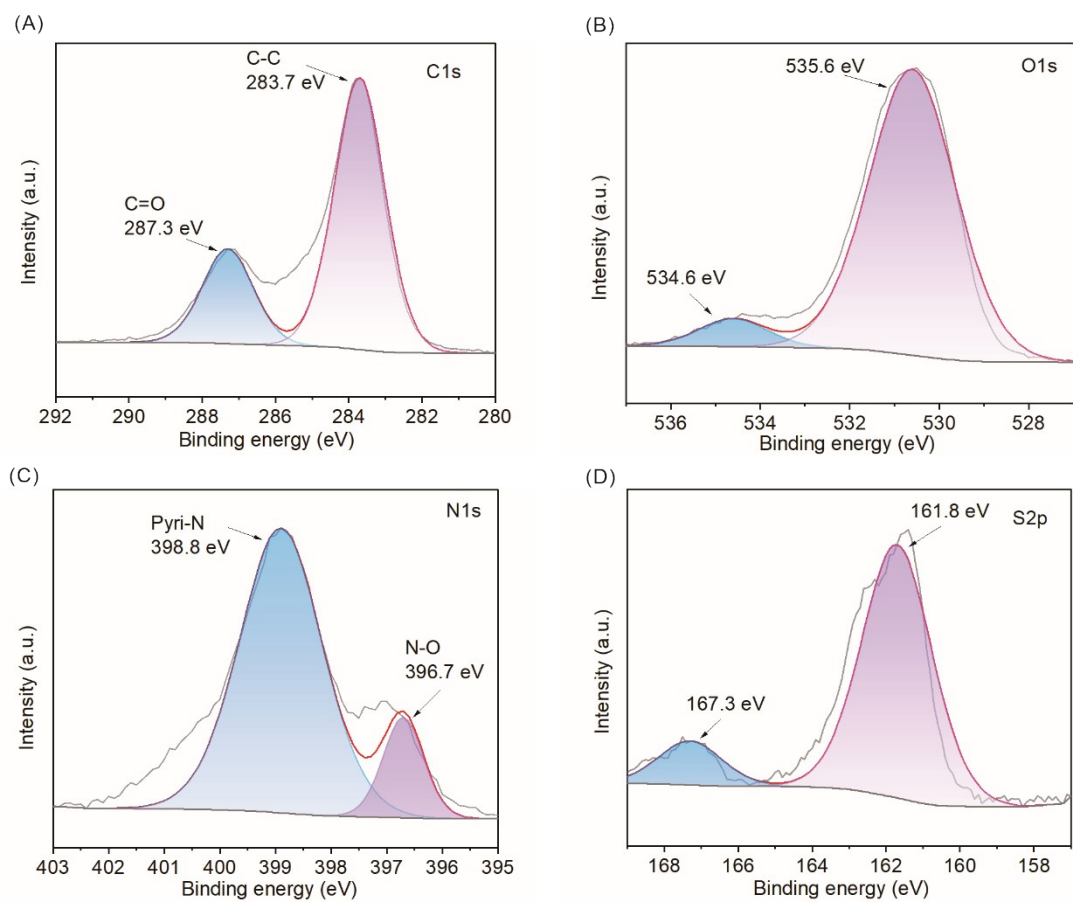

**Fig. S6.**

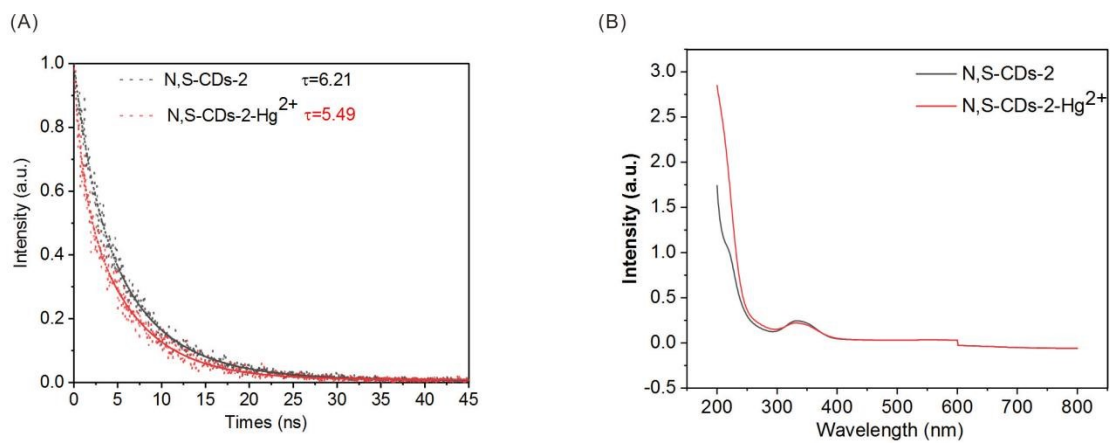

**Fig. S7.**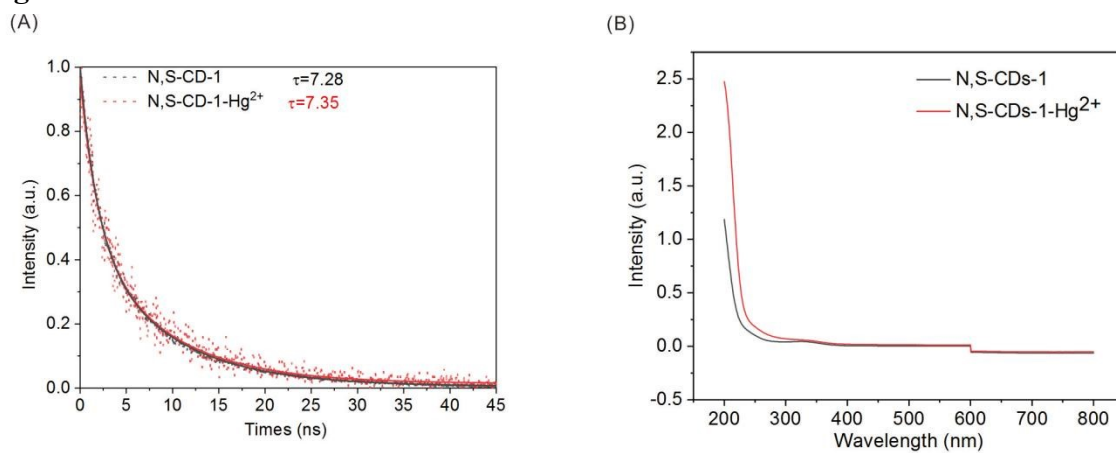**Fig. S8.**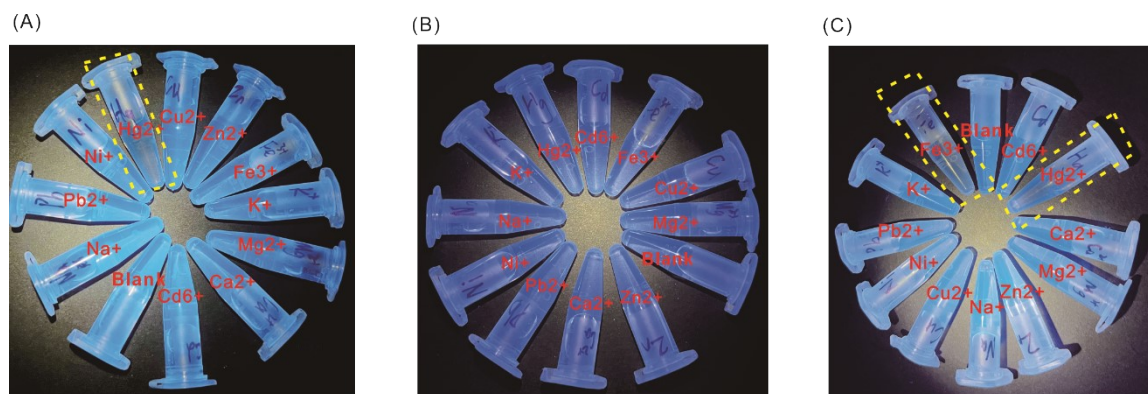**Fig. S9.**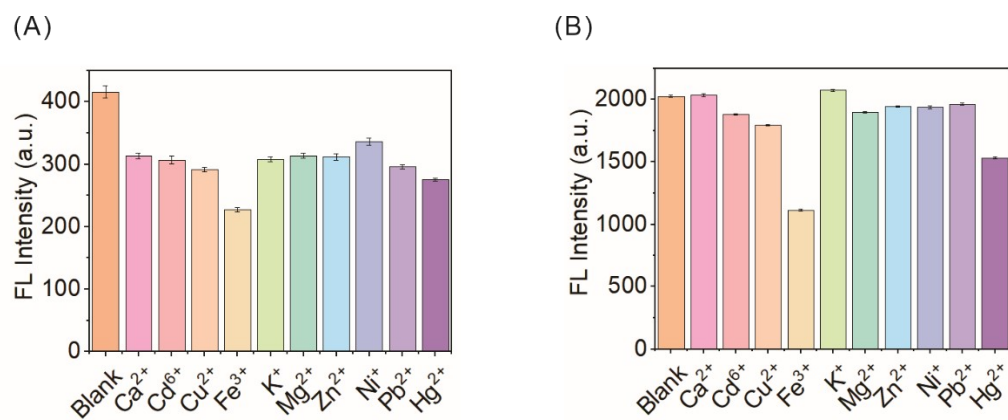



**Fig. S10.**

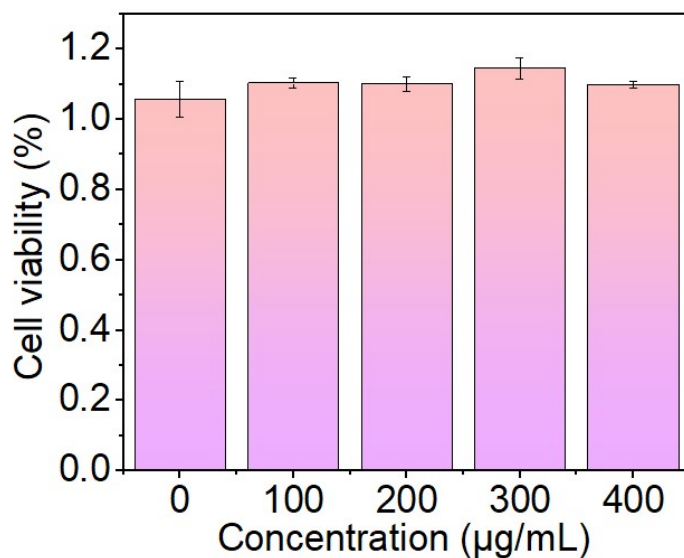

**Table S1**

| Temperature | $K_{SV}$ ( $L \cdot mol^{-1}$ ) | $k_q$ ( $L \cdot mol^{-1} \cdot s^{-1}$ ) | $R^2$  |
|-------------|---------------------------------|-------------------------------------------|--------|
| 30°C        | $3.933 \times 10^4$             | $5.619 \times 10^{12}$                    | 0.9927 |
| 40°C        | $4.756 \times 10^4$             | $6.794 \times 10^{12}$                    | 0.9962 |
| 50°C        | $5.371 \times 10^4$             | $7.673 \times 10^{12}$                    | 0.9929 |

**Table S2**

| Samples  | Content (average $\pm$ SD, RSD%, µg/kg) (n=3) |                      |
|----------|-----------------------------------------------|----------------------|
|          | This method                                   | ICP-MS               |
| Sanqi001 | 25.8 $\pm$ 0.3 (1.6)                          | 24.8 $\pm$ 0.2 (0.6) |
| Sanqi002 | 25.5 $\pm$ 0.4 (1.7)                          | 25.6 $\pm$ 0.1 (0.7) |
| Sanqi003 | 26.8 $\pm$ 0.6 (1.8)                          | 26.2 $\pm$ 0.3 (0.8) |
